# Supplementary material
Source: PubMed Central journal article supplement (PMC3098940)
Supplement: NIHMS266118-supplement-1_si_001.pdf [file NIHMS266118-supplement-1_si_001.pdf]

## Supplemental Figures:

### SF1) C48 can alkylate cysteine using glutathione as a model compound

A) *Positive ion electrospray mass spectrum (MS) of the adduct of C48 with glutathione (GSH).* A protonated molecular ion was observed at  $m/z$  624.1868 (calculated for  $C_{27}H_{34}N_3O_{12}S^+$ : 624.1858).

B) *Fragment ion spectrum (MS/MS) of the GSH-C48 molecular ion.* Collision-induced dissociation fragment ion spectrum (MS/MS) of the ion at  $m/z$  624.1 yielded the C48 carbocation at  $m/z$  317.1021 (calculated for  $C_{17}H_{17}O_6^+$ : 317.1020), the protonated molecular ion for GSH at  $m/z$  308.0922 (calculated for  $C_{10}H_{18}N_3O_3S^+$ : 308.0911), and the y2 fragment of the protonated molecular ion for GSH at  $m/z$  179.0485 (calculated for  $C_5H_{11}N_2O_3S^+$ : 179.0485).

All spectra were acquired by LC-MS/MS on an Agilent 6520 QTOF mass spectrometer equipped with an Agilent 1200 series nanoflow HPLC and Chip-cube source (Agilent Technologies, Santa Clara, CA). The loading and analytical pumps used the same solvent system. Solvent A was 100% aqueous and solvent B was 90% acetonitrile, both with 0.1% formic acid. Sample was loaded onto a standard capacity chip (40 nl trapping column, 43 mm x 75  $\mu$ m analytical column, packed with Zorbax 5  $\mu$ m 300 Å C18 silica) at 6  $\mu$ l/min in 99% solvent A. After loading, the sample was washed with 8  $\mu$ l of the same solvent to remove salts. After washing, the chip cube valve was switched so the trapping and analytical columns were on-line with the analytical pump. The sample was eluted at 600 nl/min with a linear gradient from 1% to 50% solvent B over 8 min, followed by a 1 min ramp to 98% solvent B, a 1 min hold at 98% B, and a 1 min ramp back to 1% B. The mass spectrometer was operated in a data dependent MS/MS mode. Full mass survey scans of singly charged ions from 300 Th to 3000 Th with specific targeting of GSH-C48 adduct  $m/z$  (624.18) were collected for 250 ms. From each survey scan, up to 6 ions with an intensity of at least 1000 counts were selected for MS/MS. MS/MS scans were also 250 ms, but were collected from 50 Th to 3000 Th. After an ion was selected for MS/MS, it was placed on an exclusion list for 15 s. Mass accuracy was improved by monitoring two lock mass ions.

### SF2) C48 does not affect Stat3 dimerization

A) *Size exclusion chromatography of Stat3.* Stat3, residues 127 to 722, is monomeric and elutes at 14.1 mL on a Superdex 200 HR column. Phosphorylation of this construct produces a dimeric species that elutes at 12.4 mL. The addition of C48 (at 200  $\mu$ M) to the monomeric or phosphorylated dimeric form does not affect their respective elution profiles, indicating that C48 does not affect pY705-mediated dimerization.

B) *Sedimentation equilibrium experiments of phospho-Stat3-C468S in the presence of C48 indicate that the protein is dimeric.* The bottom panel shows the radial absorbance at 280 nm collected at 20 °C and 5 speeds (light blue = 6000 RPM; black = 8000 RPM; dark blue = 10000 RPM; green = 12000 RPM; red = 14000 RPM). The radial absorbance

for each speed was collected after 10 hrs once at speed and rescanned after 2 hrs to ensure the system was at equilibrium. The data was fit as a single species using Fast Fitter<sup>1</sup>. The calculated molecular weight was 143,000 +/- 1000 g/mol with  $V_{\text{bar}} = 0.718$  (calculated from the sequence using SEDNTERP - <http://jphilo.mailway.com/download.htm>) and the solvent density,  $\rho = 1.0041$ , calculated for PBS. The residuals are shown as an autocorrelation function. A flat line (e.g., random error) indicates a good fit.

### **SF3) Effect of C48 on Jak1 and Jak2 kinase activity *in vitro***

C48 and Staurosporine (positive control compound) were tested in 10-dose  $IC_{50}$  mode with 3-fold serial dilution starting at 400  $\mu\text{M}$  (C48) or 20  $\mu\text{M}$  (Staurosporine). Reactions were carried out at 10  $\mu\text{M}$  ATP. A) Summary table with  $IC_{50}$ . B) Raw data, % enzyme activity (relative to DMSO control), and curve fits. Assays were performed by Reaction Biology Corporation, Malvern, PA-19355.

### **Reference:**

- (1) Arkin, M.; Lear, J. D. *Anal Biochem* **2001**, 299, 98.

Buettner et al.  
SUPPLEMENTAL  
FIGURE 1

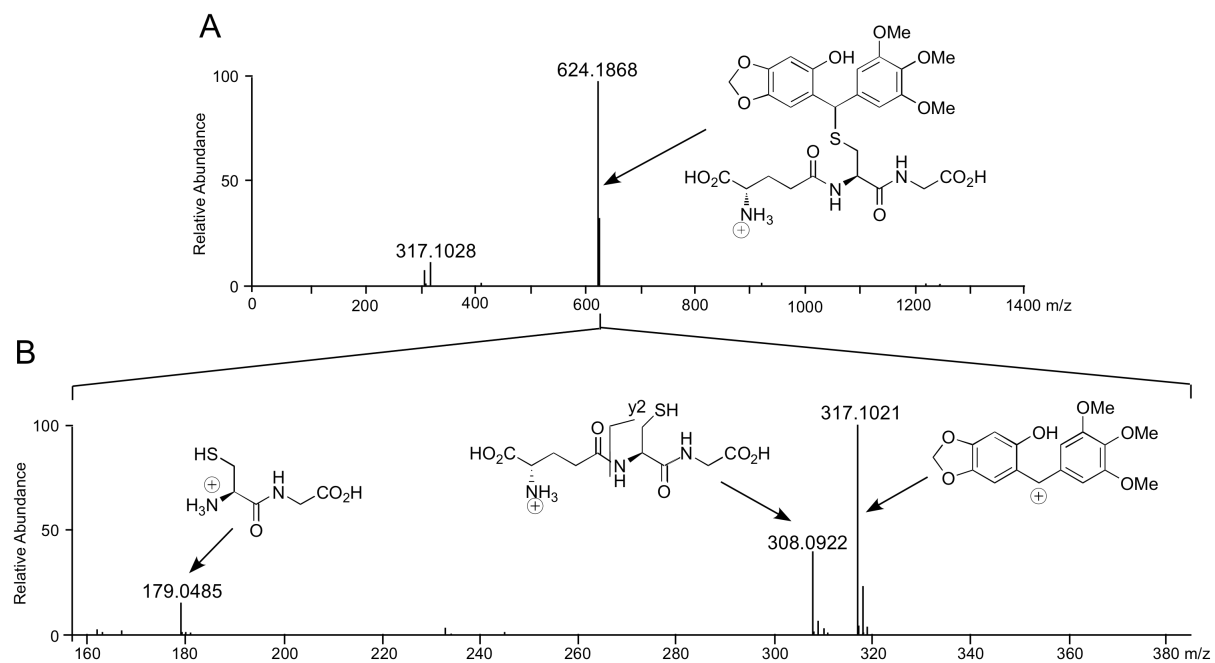

Buettner et al.  
SUPPLEMENTAL  
FIGURE 2

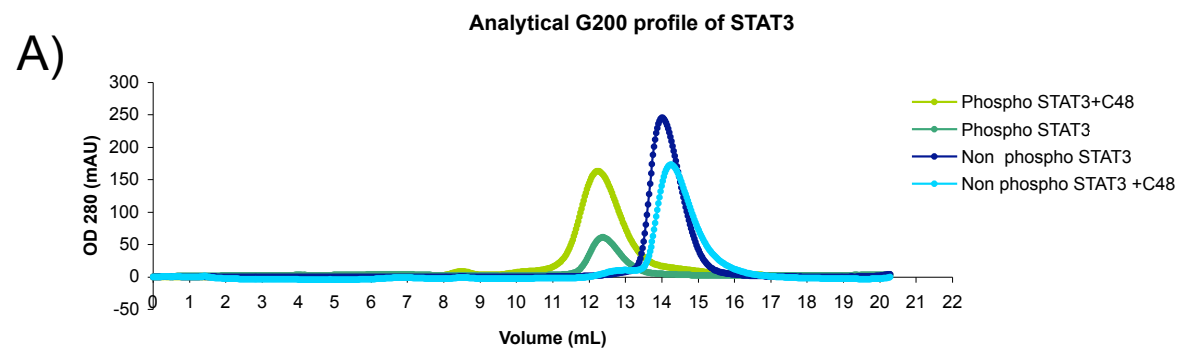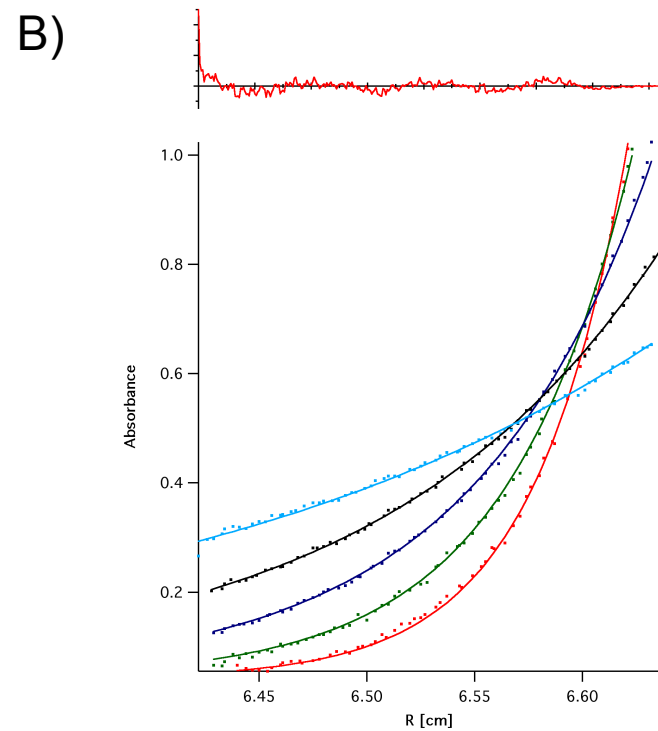

Buettner et al.  
SUPPLEMENTAL  
FIGURE 3

A)

| Kinase: | Compound IC <sub>50</sub> |               |
|---------|---------------------------|---------------|
|         | C48                       | Staurosporine |
| JAK1    | > 400 μM                  | <1.0 nM       |
| JAK2    | > 400 μM                  | <1.0 nM       |

B)

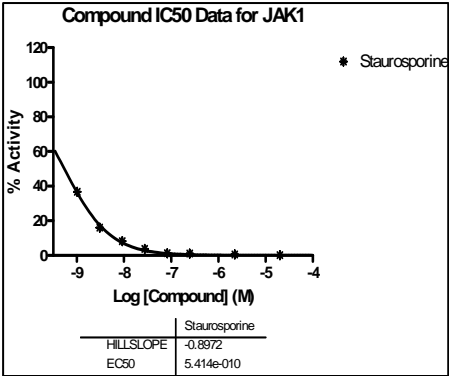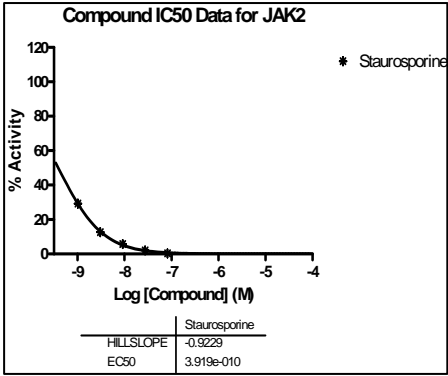

| Kinase Profiling Report for: |        | JAK1          |                   |
|------------------------------|--------|---------------|-------------------|
| Raw Data                     |        |               |                   |
| Conc. (M)                    | C48    | Staurosporine | Stauro, Conc. (M) |
| 4.00E-04                     | 447132 | 921           | 2.00E-05          |
| 1.33E-04                     | 478369 | -654          | 6.67E-06          |
| 4.44E-05                     | 513228 | 3013          | 2.22E-06          |
| 1.48E-05                     | 513611 | -1299         | 7.41E-07          |
| 4.94E-06                     | 550720 | 5878          | 2.47E-07          |
| 1.65E-06                     | 558862 | 7042          | 8.23E-08          |
| 5.49E-07                     | 565998 | 22098         | 2.74E-08          |
| 1.83E-07                     | 549340 | 48381         | 9.14E-09          |
| 6.10E-08                     | 533688 | 94551         | 3.05E-09          |
| 2.03E-08                     | 551682 | 216095        | 1.02E-09          |
| DMSO                         | 584850 | 586800        | DMSO              |
| % Activity                   |        |               |                   |
| Conc. (M)                    | C48    | Staurosporine | Stauro, Conc. (M) |
| 4.00E-04                     | 76.05  | 0.16          | 2.00E-05          |
| 1.33E-04                     | 81.37  | -0.11         | 6.67E-06          |
| 4.44E-05                     | 87.29  | 0.51          | 2.22E-06          |
| 1.48E-05                     | 87.36  | -0.22         | 7.41E-07          |
| 4.94E-06                     | 93.67  | 1.00          | 2.47E-07          |
| 1.65E-06                     | 95.06  | 1.20          | 8.23E-08          |
| 5.49E-07                     | 96.27  | 3.76          | 2.74E-08          |
| 1.83E-07                     | 93.44  | 8.23          | 9.14E-09          |
| 6.10E-08                     | 90.77  | 16.08         | 3.05E-09          |
| 2.03E-08                     | 93.84  | 36.76         | 1.02E-09          |
| DMSO                         | 99.48  | 99.81         | DMSO              |
| HILLSLOPE                    |        | -0.90         |                   |
| IC50 (M)                     |        | 5.41E-10      |                   |

| Kinase Profiling Report for: |         | JAK2          |                   |
|------------------------------|---------|---------------|-------------------|
| Raw Data                     |         |               |                   |
| Conc. (M)                    | C48     | Staurosporine | Stauro. Conc. (M) |
| 4.00E-04                     | 862133  | -4829         | 2.00E-05          |
| 1.33E-04                     | 838140  | -11367        | 6.67E-06          |
| 4.44E-05                     | 998838  | -1782         | 2.22E-06          |
| 1.48E-05                     | 954274  | -1898         | 7.41E-07          |
| 4.94E-06                     | 1009545 | -1362         | 2.47E-07          |
| 1.65E-06                     | 793471  | 4335          | 8.23E-08          |
| 5.49E-07                     | 818822  | 23872         | 2.74E-08          |
| 1.83E-07                     | 1007560 | 66202         | 9.14E-09          |
| 6.10E-08                     | 963781  | 145399        | 3.05E-09          |
| 2.03E-08                     | 979128  | 337185        | 1.02E-09          |
|                              | DMSO    | 911982        | DMSO              |
|                              |         |               |                   |
| % Activity                   |         |               |                   |
| Conc. (M)                    | C48     | Staurosporine | Stauro. Conc. (M) |
| 4.00E-04                     | 94.53   | -0.42         | 2.00E-05          |
| 1.33E-04                     | 91.90   | -0.99         | 6.67E-06          |
| 4.44E-05                     | 109.52  | -0.15         | 2.22E-06          |
| 1.48E-05                     | 104.64  | -0.16         | 7.41E-07          |
| 4.94E-06                     | 110.70  | -0.12         | 2.47E-07          |
| 1.65E-06                     | 87.01   | 0.38          | 8.23E-08          |
| 5.49E-07                     | 89.78   | 2.07          | 2.74E-08          |
| 1.83E-07                     | 110.48  | 5.75          | 9.14E-09          |
| 6.10E-08                     | 105.68  | 12.62         | 3.05E-09          |
| 2.03E-08                     | 107.36  | 29.26         | 1.02E-09          |
|                              | DMSO    | 100.00        | DMSO              |
|                              |         |               |                   |
| HILLSLOPE                    |         | -0.92         |                   |
| IC50 (M)                     |         | 3.92E-10      |                   |
